# Supplementary material for: Band alignment type I, II transformations in Hf2CO2/MoS2 heterostructures using biaxial strain, external electric field, and interlayer coupling: a first principal investigation
Source: Royal Society of Chemistry journal article supplement (doi:10.1039/d3cp04546c), 2023-01-01
Supplement: d3cp04546c1.pdf [file d3cp04546c1.pdf]

## Supporting Information

for

### Band alignment type I, II transformations in $\text{Hf}_2\text{CO}_2/\text{MoS}_2$ heterostructures using biaxial strain, external electric field, and interlayer coupling: a first principal investigation

*Sukhanova E.V.<sup>1,\*</sup>, Popov Z.I.<sup>1,\*</sup>*

<sup>1</sup> Emanuel Institute of Biochemical Physics RAS, 119334, 4 Kosigin st., Moscow, Russia;

**Corresponding authors:** yekaterina.sukhanova@phystech.edu (EVS), zipcool@bk.ru (ZIP)

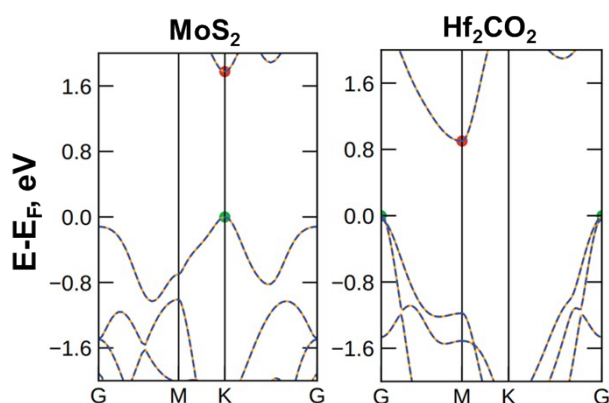

Figure S1. Band structures of pristine separate  $\text{MoS}_2$  and  $\text{Hf}_2\text{CO}_2$  monolayers with respect to Fermi energy value.

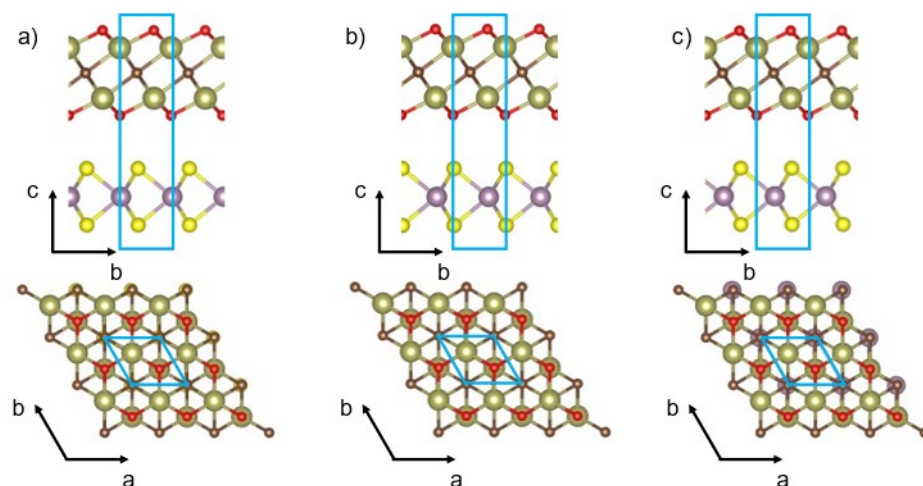

Figure S2. The considered stacking of  $\text{Hf}_2\text{CO}_2$  and  $\text{MoS}_2$  monolayers with the energy calculated relative to the structure in figure c: a) 0.005 eV, b) 0.060 eV, c) 0.000 eV.

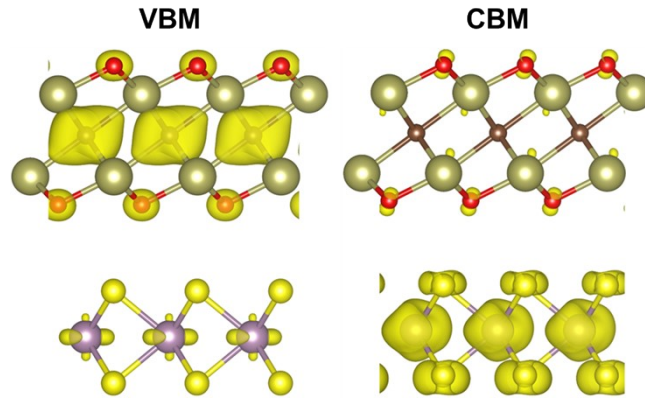

Figure S3. Partial charge density for the band edges of the  $\text{Hf}_2\text{CO}_2/\text{MoS}_2$  heterostructure.

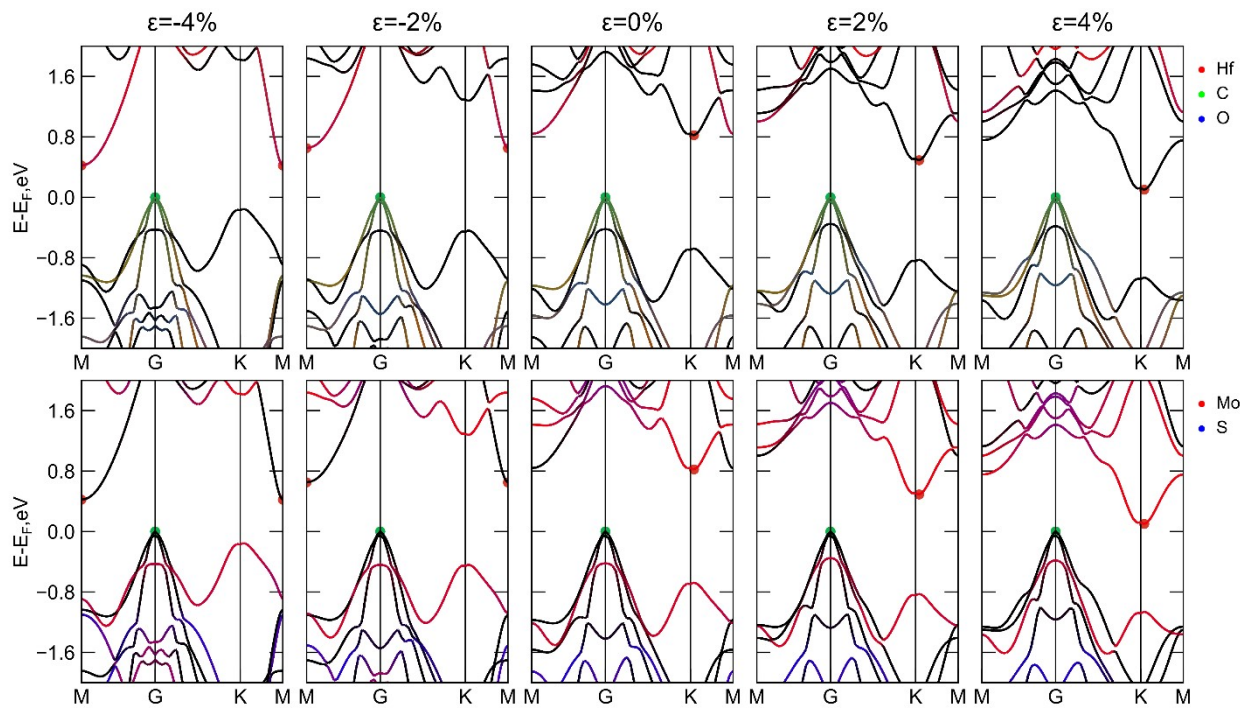

Figure S4. Atom-resolved electronic band structures of biaxially deformed  $\text{Hf}_2\text{CO}_2/\text{MoS}_2$  heterostructure concerning Fermi energy value.

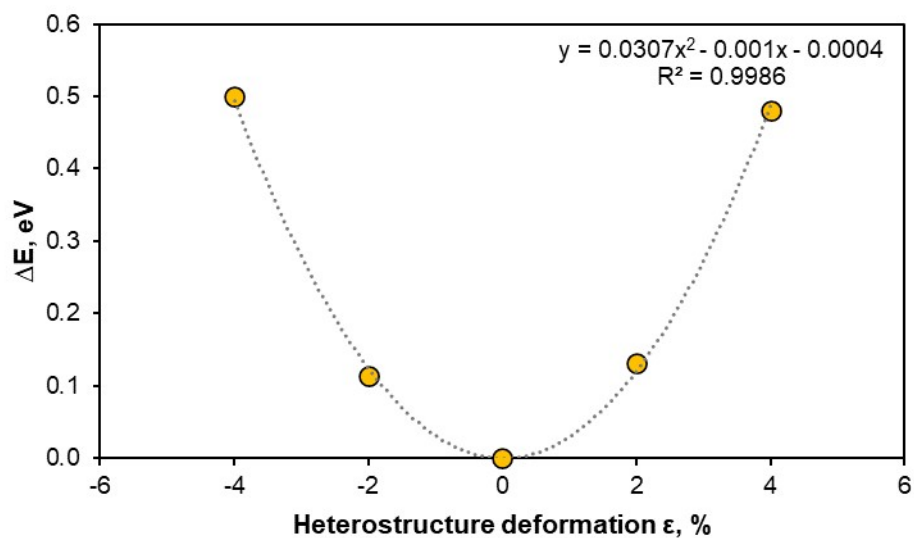

Figure S5. Total energy dependence of biaxially deformed  $\text{Hf}_2\text{CO}_2/\text{MoS}_2$  heterostructure.

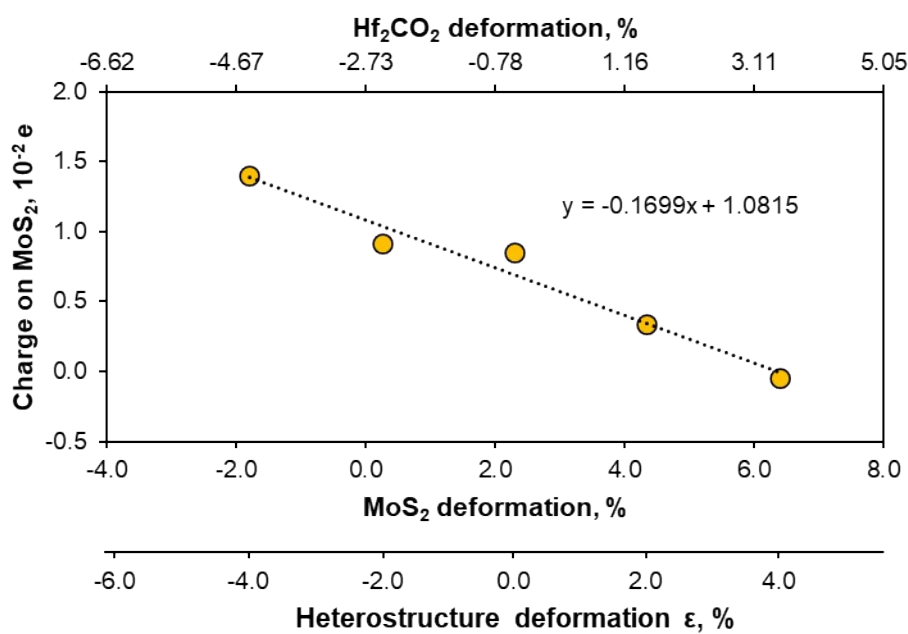

Figure S6. Bader charges analysis of biaxially deformed  $\text{Hf}_2\text{CO}_2/\text{MoS}_2$  heterostructure.

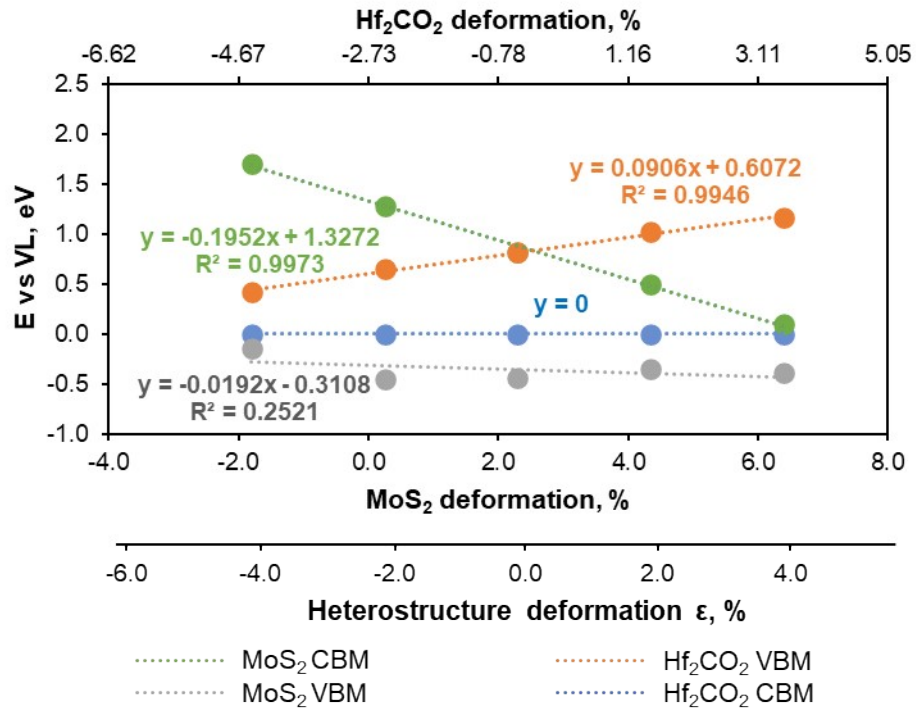

Figure S7. Heterostructure components band edges dependencies on the applied biaxial strain.

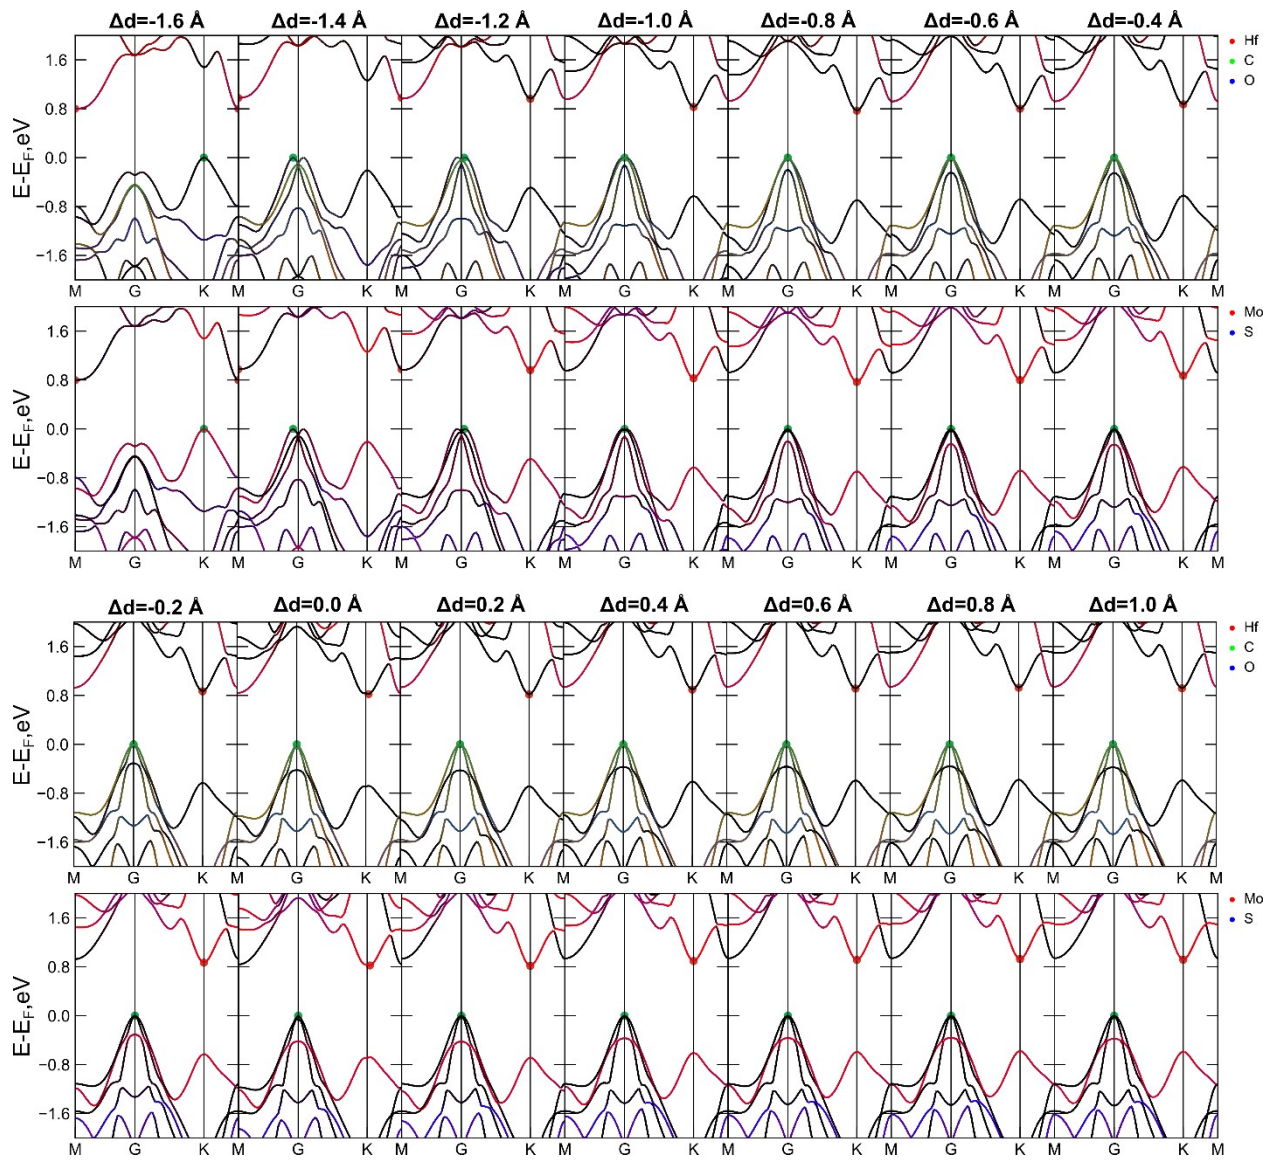

Figure S8. The dependence of the atom-resolved electronic band structures on the interlayer coupling for the  $\text{Hf}_2\text{CO}_2/\text{MoS}_2$  heterostructure concerning Fermi energy value.

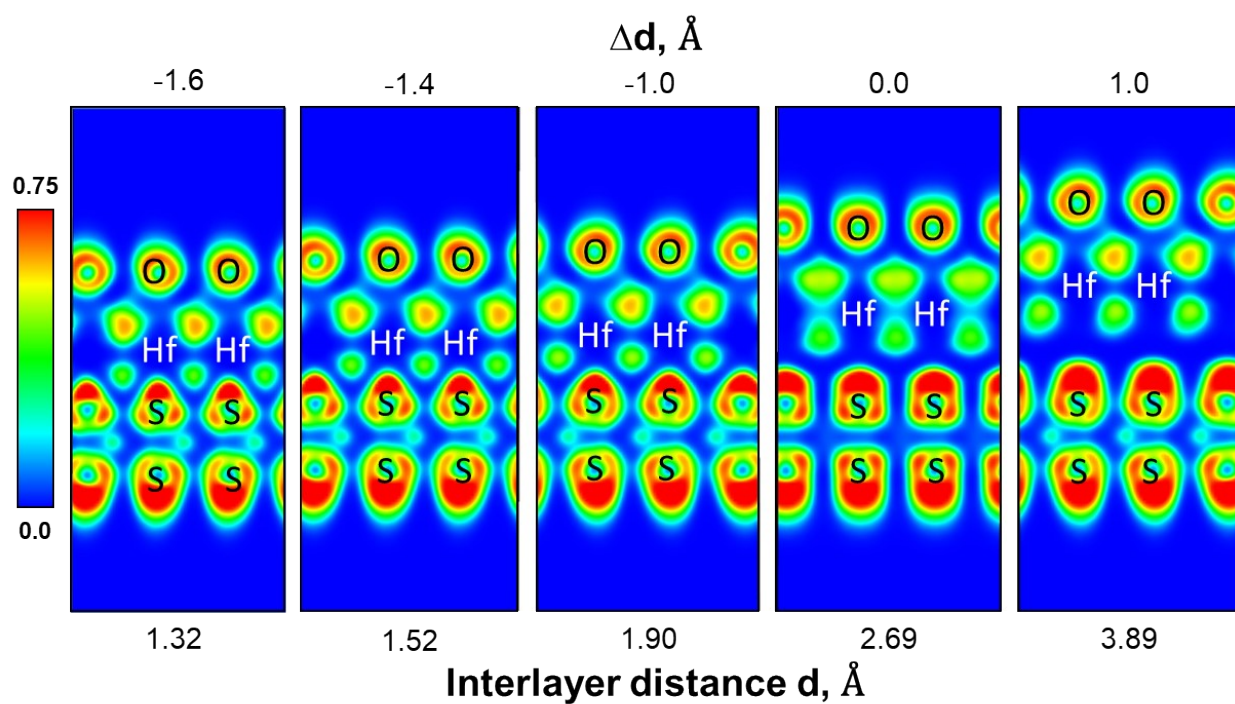

Figure S9. The electron localization function plots the chosen interlayer distances for the  $\text{Hf}_2\text{CO}_2/\text{MoS}_2$  heterostructure.

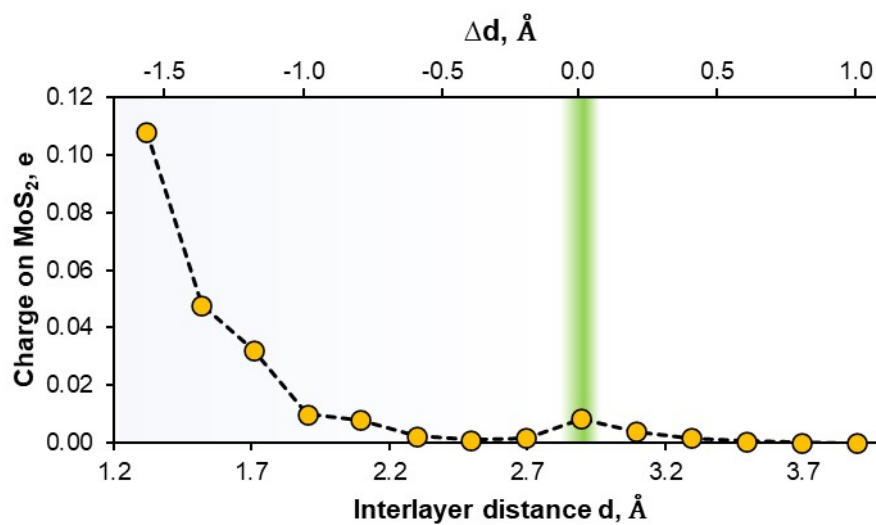

Figure S10. Bader charges analysis for the different interlayer coupled  $\text{Hf}_2\text{CO}_2/\text{MoS}_2$  heterostructures. By the green point, the equilibrium interlayer distance is marked.

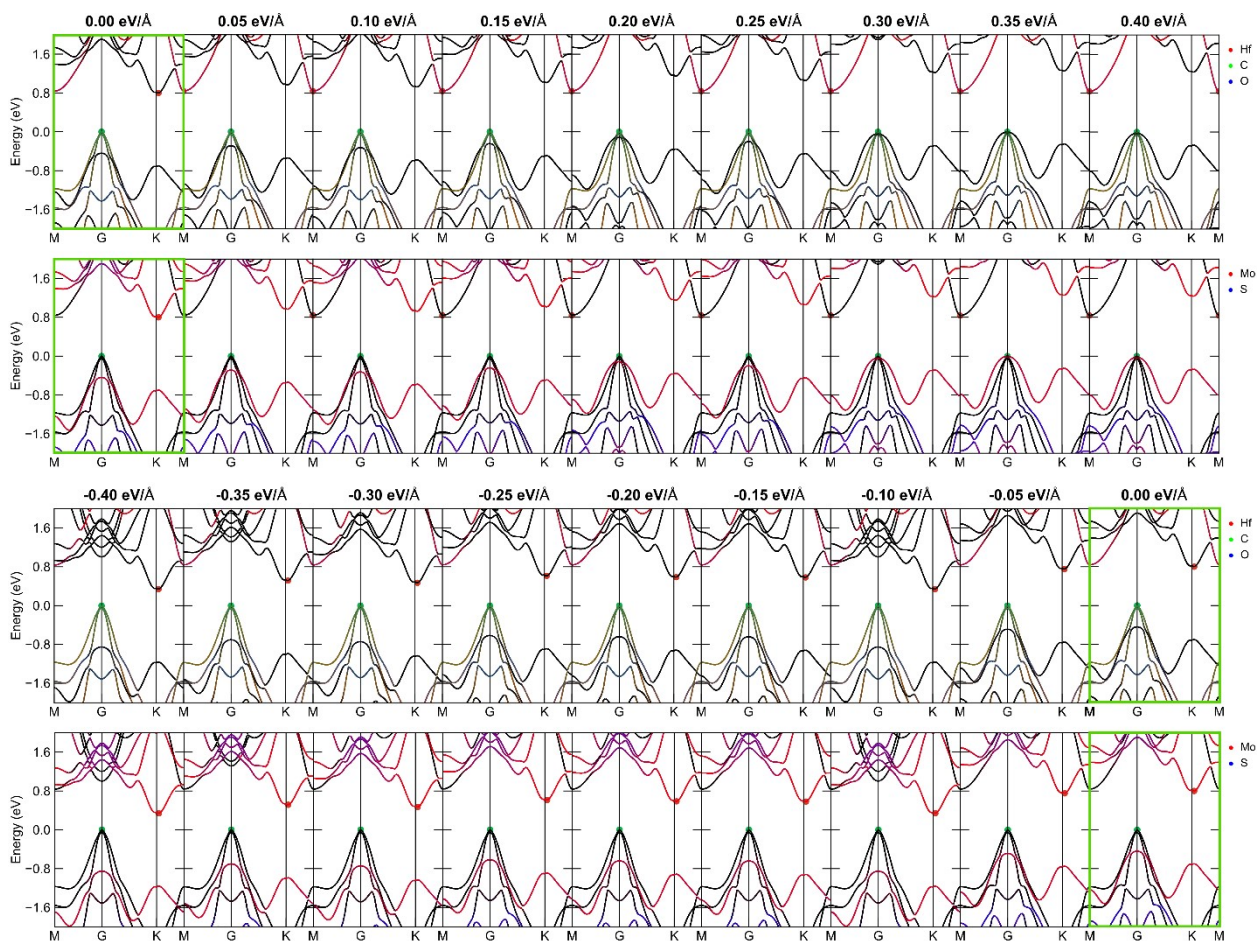

Figure S11. The dependence of the atom-resolved electronic band structures on the applied external electric field for the  $\text{Hf}_2\text{CO}_2/\text{MoS}_2$  heterostructure concerning Fermi energy value. By green frames, the initial band structure is highlighted.

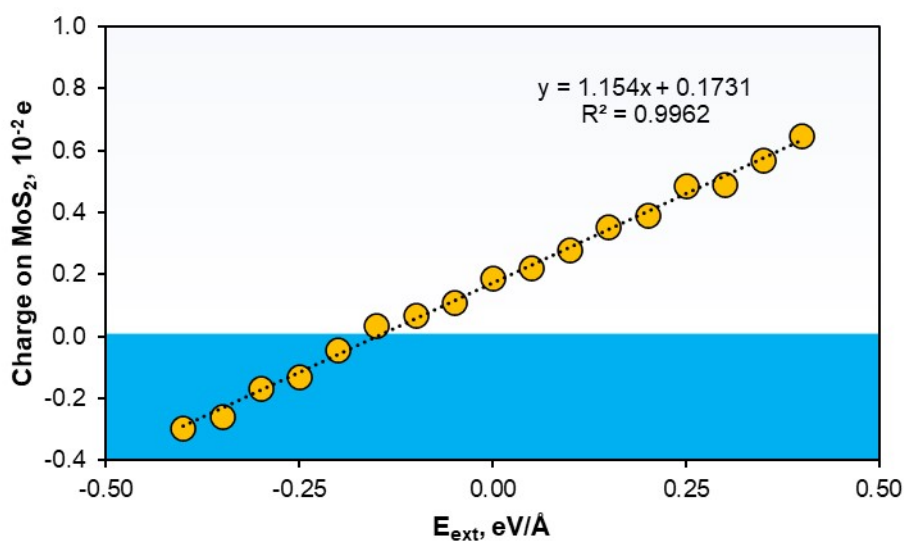

Figure S12. Bader charges analysis for the different values of applied to  $\text{Hf}_2\text{CO}_2/\text{MoS}_2$  heterostructure external electric field.
